# Supplementary material for: Murine myeloid cell MCPIP1 suppresses autoimmunity by regulating B-cell expansion and differentiation
Source: PubMed Central journal article supplement (PMC7988765; doi:10.1242/dmm.047589), 2021-03-18
Supplement: dmm-14-047589-s1.pdf [file dmm-14-047589-s1.pdf]

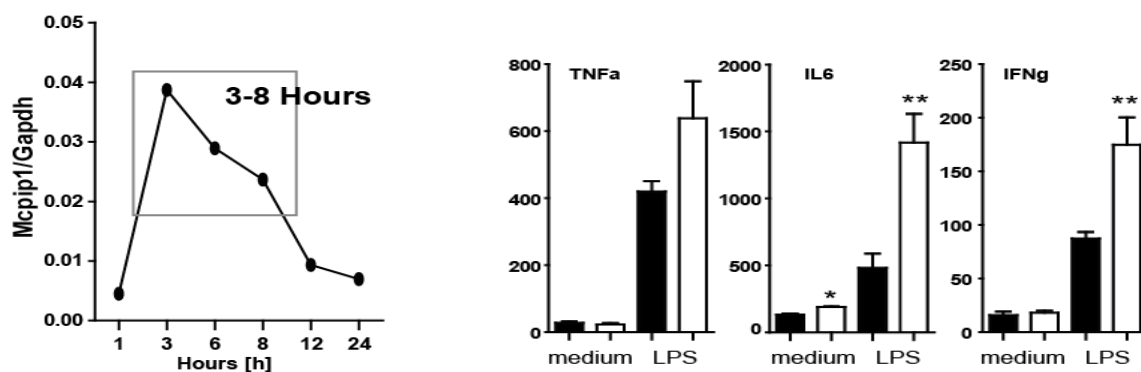

**Fig. S1. Bone marrow-derived macrophages and LPS stimulation** A: bone marrow derived macrophages were stimulated with 2 ng/ml ultrapure LPS for 1 to 24 hours as indicated in the figure. mRNA expression of Mcpip1 was measured by RT-qPCR. B: knockout and control macrophages were stimulated with LPS for 6 hours levels of TNF- $\alpha$ , IL-6 and IFN- $\gamma$  were measured by ELISA. Data represent means  $\pm$  SEM from 3 independent stimulations. \*\* p<0.01.

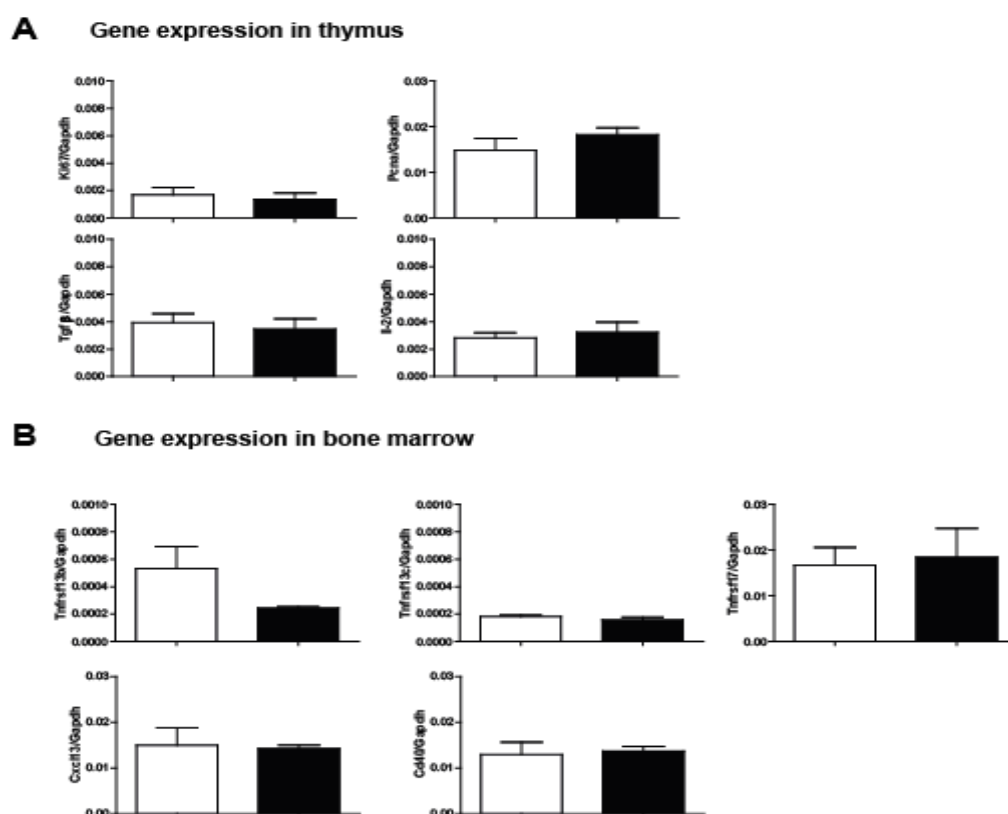

**Fig. S2. Gene expression in thymus and bone marrow.** RNA was isolated from knockout and control mice for real-time PCR analysis. Data are means  $\pm$  SEM from at least 8 mice per group, versus control mice.

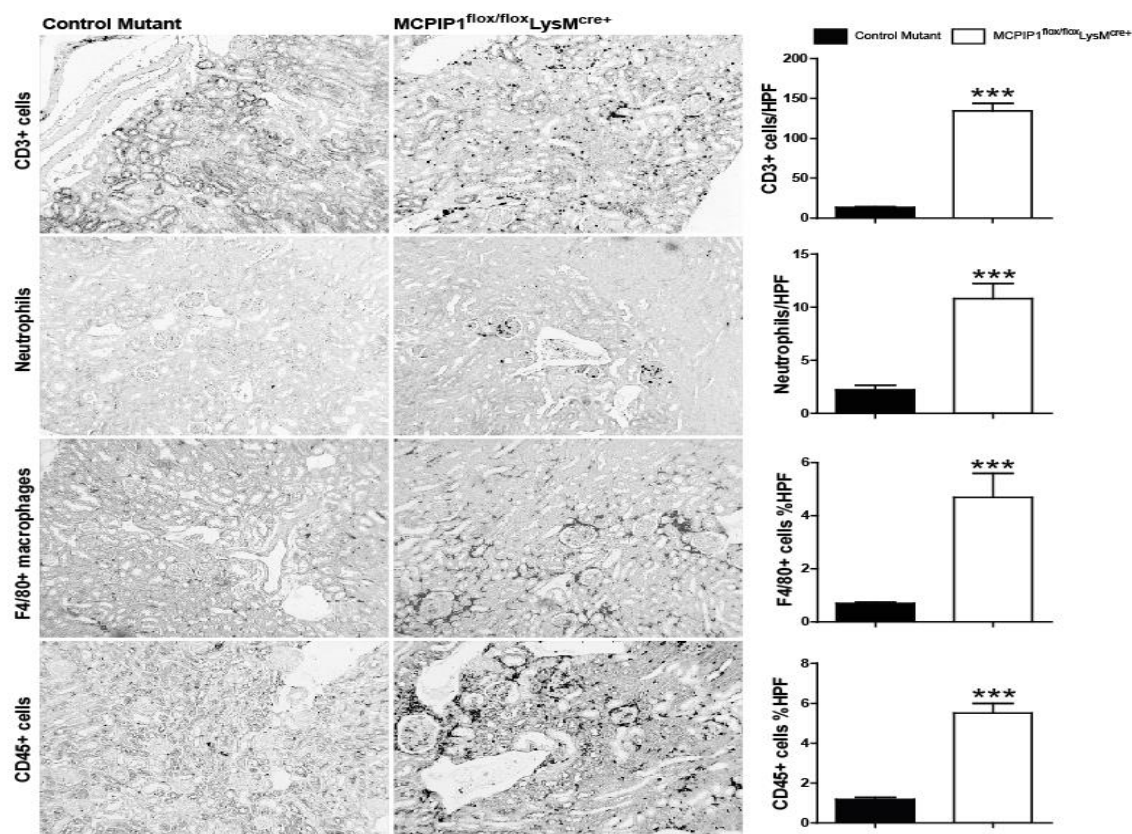

**Fig. S3. Renal immune cell infiltration.** Kidney sections were stained with CD3+, CD45+, F4/80+, and Neutrophils and quantified by counting (CD3, Neutrophils) or by using a semi-quantitative score (CD45, F4/80). Data are shown as means of at least 40 scored HPF or quantified in glomeruli from at least 8 mice in each group; \*\*\*  $p < 0.001$ .

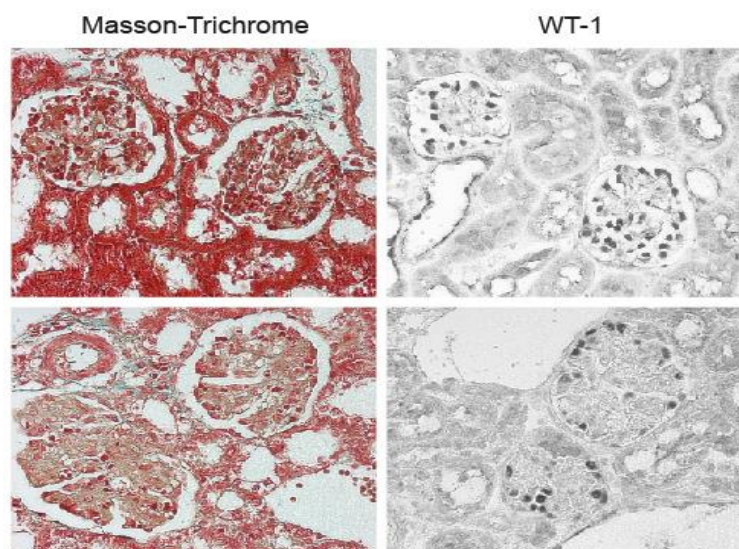

**Fig. S4. Renal fibrosis and podocyte staining.** Kidney sections were stained Masson Trichrome and WT-1 (podocyte marker) to visualize fibrosis and podocyte loss respectively.

### A Gene expression in blood

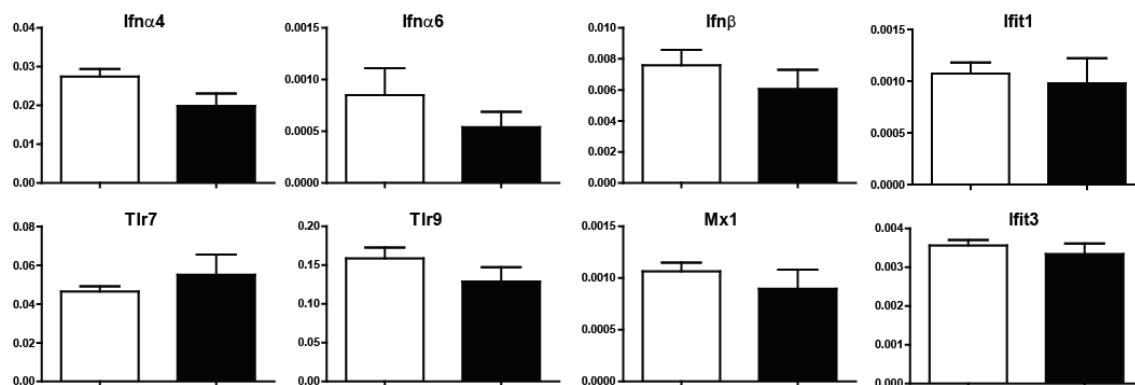

### B Gene expression in spleen tissue

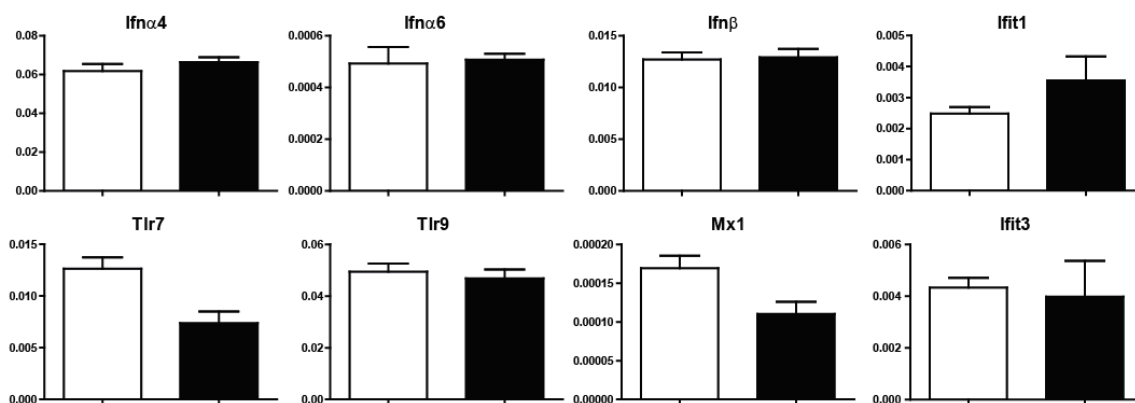

**Fig. S5.** Gene expression (relative to Gapdh) in whole blood (A) and spleen (B). RNA was isolated from knockout and control mice for real-time PCR analysis. Data are means  $\pm$  SEM from at least 8 mice per group, versus control mice.

**Table S1. Primers used for RT-PCR**

| Gene name      | Accession Nr. | Sequence Forward Primer           | Sequence Reverse Proimer.          |
|----------------|---------------|-----------------------------------|------------------------------------|
| Bcl 6          | NM_009744     | :: 5'-AGTTTCTAGGAAAGGCCGGA-3'     | :: 5'-ACTAGCGTGCCGGTAAACT-3'       |
| Bcl 10         | NM_009740     | :: 5'-ACGGAGGAGGATTTGACTGA-3'     | :: 5'-TGCACGTAGATGATCAAAATGTC-3'   |
| Ccl 28         | NM_020279     | :: 5'-GTTCATGCAGCATCCAGAGAGC-3'   | :: 5'-TCTGAGGCTCTCATCCACTGCT-3'    |
| Cd 40          | NM_011611     | :: 5'-ACCAGCAAGGATTGCGAGGCAT-3'   | :: 5'-GGATGACAGACGGTATCAGTGG-3'    |
| Cd40l          | NM_011616     | :: 5'-GAACTGTGAGGAGATGAGAAGGC-3'  | :: 5'-TGGCTTCGCTTACAACGTGTGC-3'    |
| Cxcl 13        | NM_018866     | :: 5'-CATAGATCGGATTCAAGTTACGCC-3' | :: 5'-GTAACCATTTGGCACGAGGATTC-3'   |
| Flt3l          | NM_010228     | :: 5'-TGGATGAGCAGTGTGAACCGCT-3'   | :: 5'-GCCAAATGCAGAGGCTTGAACG-3'    |
| Foxp3          | NM_001199347  | :: 5'-TTCATGCATCAGCTCTCCAC-3'     | :: 5'-CTGGACACCCATTCCAGACT-3'      |
| Gapdh          | NM_001289726  | :: 5'-CATGGCCTTCCGTGTTCTCA-3'     | :: 5'-CCTGCTTACCACCTTCTCA-3'       |
| Gata3          | NM_001355110  | :: 5'-GCCTGCGGACTCTACCATAA-3'     | :: 5'-AGGATGTCCCTGCTCTCCTT-3'      |
| Ifn $\alpha$ 4 | NM_010504     | :: 5'-TTCTGCAATGACCTCCATCA-3'     | :: 5'-TATGTCTCCACAGCCAGCAG-3'      |
| Ifn $\alpha$ 6 | NM_206871     | :: 5'-TGGAAATGCAACCCCTCTAGA-3'    | :: 5'-TCAGGGGAAGTGCCTGTATC-3'      |
| Ifn $\beta$    | NM_010510     | :: 5'-CTCAGGGTGTGATGAGGTC-3'      | :: 5'-CCCAGTGTGGAGAAATTGT-3'       |
| Ifn $\gamma$   | NM_008337     | :: 5'-ACAGCAAGGCCAAAAAGGAT-3'     | :: 5'-TGAGCTCATTGAATGCTTGG-3'      |
| Il-2           | NM_008366     | :: 5'-GCGGCATGTCTGGATTGACTC-3'    | :: 5'-CCACCACAGTTGCTGACTCATC-3'    |
| Il-4           | NM_021283     | :: 5'-ATGGATGTGCCAAACGTCCT-3'     | :: 5'-AGCTTATCGATGAATCCAGGCA-3'    |
| Il-5           | NM_010558     | :: 5'-GATGAGGCTTCTGTCCCTACT-3'    | :: 5'-TGACAGGTTTIGGAATAGCATTTCC-3' |
| Il-6           | NM_031168     | :: 5'-CTCTGCAAGAGACTTCCATCCA-3'   | :: 5'-CTGCAAGTGCATCATCGTTGT-3'     |
| Il-7           | NM_008371     | :: 5'-CAGGAAGTATAGTAATTGCCCG-3'   | :: 5'-CTTCAACTTGCGAGCAGCAGCA-3'    |
| Il-9           | NM_008373     | :: 5'-TCCACCGTCAAAATGCAGTGC-3'    | :: 5'-CCGATGGAAAACAGGCAAGAGTC-3'   |
| Il-10          | NM_010548     | :: 5'-ATCGATTCTCCCTGTGAA-3'       | :: 5'-TGTCAAATTCATTATGGCT-3'       |
| Il-15          | NM_001254747  | :: 5'-GTAGTCTCCCTAAACAGAGGC-3'    | :: 5'-TCCAGGAGAAAAGCAGTTCAATGC-3'  |
| Il-23          | NM_031252     | :: 5'-CATGCTAGCCTGGAACGCACAT-3'   | :: 5'-ACTGGCTGTTGCTCTTGAAGTCC-3'   |
| Ki67           | NM_001081117  | :: 5'-GAAGTCAAAGAGCAAGAGGCAA-3'   | :: 5'-TCTTGAGGCTCGCCTTGATG-3'      |
| Mx1            | NR_003520     | :: 5'-TCTGAGGAGAGCCAGACGAT-3'     | :: 5'-CTCAGGGTGTGATGAGGTC-3'       |
| Pax5           | NM_008782     | :: 5'-TGACGCAGGTGTCATCGGTGAG-3'   | :: 5'-ATTCGGCACTGGAGACTCCTGA       |
| Pena           | NM_011045     | :: 5'-TGGATAAAGAAGAGGAGGCG-3'     | :: 5'-GGAGACAGTGGAGTGGCTTT-3'      |
| Prdm1          | NM_007548     | :: 5'-ACCAAGGAACCTGCTTTTCA-3'     | :: 5'-TAGACTTACCAGTATGAGGG-3'      |
| Rorc           | NM_001293734  | :: 5'-ACAGAGACACCACGGACAT-3'      | :: 5'-GGTGATAACCCCGTAGTGA -3'      |
| Tbx21/Tbet     | NM_019507     | :: 5'-TCAACCAGCACCAGACAGAG-3'     | :: 5'-ATCCTGTAATGGCTGTGGG-3'       |
| Tgf $\beta$    | NM_011577     | :: 5'-GGAGAGCCCTGGATACCAAC-3'     | :: 5'-CAACCAGGCTCTTCTCTAAA-3'      |
| Tlr7           | NM_001290755  | :: 5'-GGATGATCCTGGCCATATCTC-3'    | :: 5'-TGTCTCTCCGTGTCCACAT-3'       |
| Tlr9           | NM_031178     | :: 5'-CAGTTTGTGACAGGGAGCCT-3'     | :: 5'-CTGTACCAGGAGGGACAAGG-3'      |
| TNF            | NM_013693     | :: 5'-GATCGGTCCCAAAGGGATG-3'      | :: 5'-GGTGGTTTGTACGACGTG-3'        |
| Tnfrsf13b/Taci | NM_021349     | :: 5'-GGTCAGACAACCTCAGGAAGGCA-3'  | :: 5'-CCAAGAAACAGCAGAAGATGGCG-3'   |
| Tnfrsf13c/Bcmd | NM_028075     | :: 5'-CACTTCAGAAGGAGTCCAGCAAG-3'  | :: 5'-CTGTCTGCATCTTCTTGAAGCG-3'    |
| Tnfrsf17/Bcma  | NM_011608     | :: 5'-GCAACCTGTCAGCCTTACTGTG-3'   | :: 5'-GTGCCAAAGAGAGGACCAAGGT-3'    |
| Tnfsf13/April  | NM_001159505  | :: 5'-GTTGCTCTTTGGTTGAGTTGGG-3'   | :: 5'-GTTGGATCAGTAGTGCACAGC-3'     |
| Tnfsf13b/Baff  | NM_033622     | :: 5'-CCTCCAAGGCATTTCTCTT-3'      | :: 5'-GACTGTCTGCAGCTGATTGC-3'      |
| Xbp1           | NM_013842     | :: 5'-TAGACCTCTGGGAGTTCCTCA-3'    | :: 5'-TGGACTCTGACACTGTTGCCCT-3'    |
| Zc3h12a/Mcpipl | NM_153159     | :: 5'-CCTGTGGTATCGACGGAAG-3'      | :: 5'-GAAGGATGTGCTGGTCTGTGATA-3'   |
